# Supplementary material for: BRCA1/2 Testing Landscape in Ovarian Cancer: A Nationwide, Real-World Data Study
Source: MDPI journal article supplement (doi:10.3390/cancers16091682), 2024-04-26
Supplement: s1 [file s1]

## Supplementary Materials

**Table S1.** Prevalence of *BRCA1/2* TPVs by the histological subtype of EOC.

|                                         | <i>BRCA1/2</i> TPV | <i>BRCA1/2</i> VUS <sup>1</sup> |
|-----------------------------------------|--------------------|---------------------------------|
|                                         | <i>n</i> (%)       | <i>n</i> (%)                    |
| <b><i>BRCA1/2</i> variants detected</b> | 74 (100.0)         | 6 (100.0)                       |
| High-grade serous                       | 67 (90.5)          | 5 (83.3)                        |
| Low-grade serous                        | 1 (1.4)            | .                               |
| Endometrioid                            | 1 (1.4)            | 1 (16.7)                        |
| Clear cell                              | 1 (1.4)            | .                               |
| Mucinous                                | .                  | .                               |
| Carcinosarcoma                          | 3 (4.1)            | .                               |
| Carcinoma NOS                           | 1 (1.4)            | .                               |

<sup>1</sup> VUS is not always reported. Abbreviations: TPV, tumor pathogenic variant; VUS, variance of unknown significance; NOS, not otherwise specified.

**Table S2.** Prevalence of *BRCA1/2* TPVs and histological subtypes for analyses reporting hybrid capture or PCR-based techniques.

|                                      | Total        | Hybrid capture | PCR-based    | P-value            |
|--------------------------------------|--------------|----------------|--------------|--------------------|
|                                      | <i>n</i> (%) | <i>n</i> (%)   | <i>n</i> (%) |                    |
| <i>BRCA1/2</i> tumor tests performed | 502 (100.0)  | 244 (100.0)    | 133 (100.0)  |                    |
| <i>BRCA1/2</i> TPVs                  | 74 (14.7)    | 33 (12.3)      | 28 (21.1)    | 0.078 <sup>1</sup> |
| <i>BRCA1</i>                         | 43 (8.6)     | 17 (7.0)       | 18 (13.5)    |                    |
| <i>BRCA2</i>                         | 31 (6.2)     | 16 (6.6)       | 10 (7.5)     |                    |
| Histological subtype <sup>2</sup>    |              |                |              |                    |
| High-grade serous                    | 311 (82.5)   | 201 (82.4)     | 110 (82.7)   | 0.882 <sup>3</sup> |
| Low-grade serous                     | 13 (3.4)     | 8 (3.3)        | 5 (3.8)      |                    |
| Endometrioid                         | 4 (1.1)      | 2 (0.8)        | 2 (1.5)      |                    |
| Clear cell                           | 15 (4.0)     | 12 (4.9)       | 3 (2.3)      |                    |
| Mucinous                             | 3 (0.8)      | 2 (0.8)        | 1 (0.8)      |                    |
| Carcinosarcoma                       | 9 (2.4)      | 6 (2.5)        | 3 (2.3)      |                    |
| Carcinoma NOS                        | 7 (1.9)      | 4 (1.6)        | 3 (2.3)      |                    |
| Other <sup>3</sup>                   | 10 (2.7)     | 5 (2.0)        | 5 (3.8)      |                    |
| Unknown                              | 5 (1.6)      | 4 (1.6)        | 1 (0.8)      |                    |

<sup>1</sup> Chi-square exact test comparing number of tests detecting *BRCA1/2* PVs for hybrid capture versus PCR-based techniques. <sup>2</sup> Reported for hybrid capture and PCR-based techniques only. <sup>3</sup> Fisher's exact test comparing distribution of histological subtypes for hybrid capture versus PCR-based techniques. <sup>3</sup> Including: Malignant Brenner tumor, mixed type histology and undifferentiated carcinoma. Abbreviations: PCR, polymerase chain reaction; TPV, tumor pathogenic variant; NOS, not otherwise specified.

**Table S3.** Assays used and genes analyzed in analyses not reporting target enrichment techniques ( $n=125$ ).

| Assays and genes                                                                                                                                                                      | n (%) <sup>*</sup> |
|---------------------------------------------------------------------------------------------------------------------------------------------------------------------------------------|--------------------|
| <b>BRCA1/2v2</b>                                                                                                                                                                      | 19 (15.2)          |
| <i>BRCA1/2</i>                                                                                                                                                                        | 2 (10.5)           |
| <i>BRCA1/2, CHEK2, TP53, FOXL2</i>                                                                                                                                                    | 2 (10.5)           |
| <i>BRCA1/2, ATM, BARD1, BRIP1, CDK12, CHEK1/2, FANCL, PALB2, PPP2R2A, RAD51B/C/D, RAD54L</i>                                                                                          | 5 (26.3)           |
| <i>ATM, ATR, BAP1, BARD1, BRCA1/2, BRIP1, CDK12, CHEK1/2, FANCA/C/E/L, FAND2, MAD2L2, MRE11A, NBN, PALB2, PPP2R2A, RAD51B/C/D, RAD54L, RIF1, TP53, TP53BP1, WRN, XRCC2/3</i>          | 1 (5.3)            |
| <i>ATM, ATR, BAP1, BARD1, BLM, BRCA1/2, BRIP1, CDK12, CHEK1/2, FANCA/C/D2/E/F/L, MAD2L2, MRE11A, NBN, PALB2, PPP2R2A, RAD51B/C/D, RAD54L, RIF1, TP53, TP53BP1, WRN, XRCC2, XRCC</i>   | 1 (5.3)            |
| <i>Unknown genes</i>                                                                                                                                                                  | 8 (42.1)           |
| <b>HRDv2</b>                                                                                                                                                                          | 15 (12.0)          |
| <i>ATM, ATR, BAP1, BARD1, BLM, BRCA1/2, BRIP1, CDK12, CHEK1/2, FANCA/C/D2/E/L, MAD2L2, MRE11A, NBN, PALB2, PPP2R2A, RAD51B/C/D, RAD54L, RIF1, TP53, TP53BP1, WRN, XRCC2/3</i>         | 9 (56.3)           |
| <i>ATM, ATR, BAP1, BARD1, BLM, BRCA1/21, BRIP1, CDK12, CHEK1/2, FANCA/C/D2/E/F, FANCL, MAD2L2, MRE11A, NBN, PALB2, PPP2R2A, RAD51B/C/D, RAD54L, RIF1, TP53, TP53BP1, WRN, XRCC2/3</i> | 5 (31.3)           |
| <i>ATM, BARD1, BRCA1/2, BRIP1, CDK12, CHEK1/2, FANCL/D2, KRAS, MRE11A, NBN, PALB2, PIK3CA, POLE, POLD1, PPP2R2A, PTEN, RAD50, RAD51, RAD51B/C/D, RAD52, RAD54L, TP53, XRCC2</i>       | 1 (6.3)            |
| <b>HRDv1.1</b>                                                                                                                                                                        | 4 (3.2)            |
| <i>ATM, ATR, BAP1, BARD1, BLM, BRCA1/2, BRIP1, CDK12, CHEK1/2, FANCA/C/D2/E/L, MD2L2, MRE11A, NBN, PALB2, PPP2R2A, RAD51B/C/D, RAD54L, RIF1, TP53, TP53BP1, WRN, XRCC2/3</i>          |                    |
| <b>Unknown assay, and unknown genes</b>                                                                                                                                               | 87 (69.6)          |

<sup>\*</sup> Denominator used for calculating percentages for assays is the total  $n=125$ , denominator used for calculating percentages for genes is the assay used.

**Table S4.** Type of platforms used for *BRCA1/2* tumor tests.

| Platforms                                   | Total<br><i>n</i> (%) |
|---------------------------------------------|-----------------------|
| <b><i>BRCA1/2</i> tumor tests performed</b> | 502 (100.0)           |
| Illumina                                    | 262 (52.2)            |
| Ion Torrent                                 | 76 (15.1)             |
| Other                                       | 8 (1.6)               |
| Not reported                                | 156 (31.1)            |

**Table S5.** Lead times for *BRCA1/2* tumor tests, reported in days.

|         | Lead time<br><i>n</i> =376 |
|---------|----------------------------|
| Mean    | 38.3                       |
| SD      | 64.2                       |
| Minimum | 0                          |
| Maximum | 525                        |

Abbreviations: SD, standard deviation.
